# Supplementary material
Source: Royal Society of Chemistry journal article supplement (doi:10.1039/d5cp05046d)
Supplement: d5cp05046d1.pdf [file d5cp05046d1.pdf]

## Supporting Information

# Optoelectronic performance of Anthracene-Based dyes with modified Hagfeldt donors in dye-sensitized solar cells

Haoyu Fan<sup>1</sup>, Songfeng Li<sup>1</sup>, Xiang Meng<sup>1</sup>, Weiwei Pei<sup>2</sup>, Tao Liu<sup>3</sup>, Minxuan Wang<sup>1</sup>, Yuanzuo Li<sup>1\*</sup>

<sup>1</sup>Northeast Forestry University, College of Science, Harbin 150040, China;

<sup>2</sup>Jiamusi University, College of Science, Jiamusi 154007, China;

<sup>3</sup>Centre for Composite Materials and Structures, Harbin Institute of Technology, Harbin 150080, China

---

Corresponding authors:

*Email:* Yuanzuo Li\* ([yzli@nefu.edu.cn](mailto:yzli@nefu.edu.cn)). ORCID: 0000-0001-8530-6903

Table S1. Contribution data of dye fragments to HOMO and LUMO.

| Dyes  | MO   | Donor   | $\pi$ -bridge | Auxiliary acceptor | Benzoic acid |
|-------|------|---------|---------------|--------------------|--------------|
| LC1   | HOMO | 75.77 % | 21.74 %       | -                  | 2.50 %       |
|       | LUMO | 5.01 %  | 70.70 %       | -                  | 24.29 %      |
| LC4   | HOMO | 71.25 % | 24.05 %       | 3.79 %             | 0.91 %       |
|       | LUMO | 3.791 % | 51.68 %       | 31.34 %            | 13.19 %      |
| LC4N  | HOMO | 75.16 % | 21.25 %       | 2.84 %             | 0.75 %       |
|       | LUMO | 3.79 %  | 45.67 %       | 38.69 %            | 11.85 %      |
| LC4NN | HOMO | 77.07 % | 20.02 %       | 2.31 %             | 0.61 %       |
|       | LUMO | 3.12 %  | 34.33 %       | 46.23 %            | 16.32 %      |

Table S2. The calculation results of  $E$ ,  $\lambda$ ,  $f$ , and transition modes for the excited-states from S1 to S12.

| Dyes | States | $E$ (eV) | $\lambda$ (nm) | $f$    | Transition mode |
|------|--------|----------|----------------|--------|-----------------|
| LC1  | 1      | 2.6207   | 473.10         | 0.6732 | H→L(0.655)      |
|      | 2      | 3.1685   | 391.30         | 0.2204 | H-1→L(0.632)    |
|      | 3      | 3.8166   | 324.85         | 0.0143 | H-6→L(0.462)    |
|      | 4      | 3.9884   | 310.86         | 0.3766 | H→L+1(0.501)    |
|      | 5      | 4.1353   | 299.82         | 1.1026 | H→L+2(0.414)    |
|      | 6      | 4.2770   | 289.89         | 0.0403 | H-2→L(0.610)    |
|      | 7      | 4.4603   | 277.97         | 0.1214 | H-7→L(0.596)    |
|      | 8      | 4.4799   | 276.75         | 0.2012 | H→L+6(0.446)    |
|      | 9      | 4.6654   | 265.75         | 0.2238 | H-11→L(0.386)   |
|      | 10     | 4.7020   | 263.69         | 0.0547 | H-3→L(0.474)    |
|      | 11     | 4.7220   | 262.57         | 0.3554 | H→L+6(0.290)    |
|      | 12     | 4.7427   | 261.42         | 0.0114 | H-15→L(0.582)   |
| LC4  | 1      | 2.5554   | 485.19         | 1.0584 | H→L(0.625)      |
|      | 2      | 3.0909   | 401.13         | 0.3135 | H-1→L(0.593)    |
|      | 3      | 3.5517   | 349.09         | 0.2965 | H→L+1(0.426)    |
|      | 4      | 3.8107   | 325.36         | 0.0131 | H-7→L(0.419)    |
|      | 5      | 4.0012   | 309.87         | 0.1171 | H-4→L(0.534)    |
|      | 6      | 4.1272   | 300.41         | 1.0668 | H→L+3(0.413)    |
|      | 7      | 4.2512   | 291.65         | 0.0466 | H-2→L(0.594)    |
|      | 8      | 4.4487   | 278.70         | 0.0051 | H-1→L+1(0.447)  |
|      | 9      | 4.4734   | 277.16         | 0.1712 | H→L+7(0.444)    |
|      | 10     | 4.5495   | 272.52         | 0.0837 | H-11→L(0.406)   |
|      | 11     | 4.6461   | 266.85         | 0.1645 | H-12→L(0.323)   |
|      | 12     | 4.6569   | 266.24         | 0.1195 | H-4→L+1(0.319)  |
| LC4N | 1      | 2.4712   | 501.72         | 1.0414 | H→L(0.615)      |
|      | 2      | 3.0190   | 410.68         | 0.3214 | H-1→L(0.585)    |
|      | 3      | 3.5177   | 352.45         | 0.2207 | H→L+1(0.440)    |
|      | 4      | 3.7904   | 327.10         | 0.0196 | H-7→L(0.428)    |
|      | 5      | 3.9049   | 317.51         | 0.2096 | H-4→L(0.555)    |
|      | 6      | 4.0976   | 302.58         | 0.4445 | H-2→L(0.524)    |
|      | 7      | 4.1740   | 297.04         | 0.6670 | H→L+3(0.429)    |

|       |        |        |        |                |                |
|-------|--------|--------|--------|----------------|----------------|
| LC4NN | 8      | 4.3330 | 286.14 | 0.0087         | H-1→L+1(0.456) |
|       | 9      | 4.3754 | 283.37 | 0.0021         | H-17→L(0.397)  |
|       | 10     | 4.4777 | 276.89 | 0.1973         | H→L+8(0.358)   |
|       | 11     | 4.5459 | 272.74 | 0.1130         | H-11→L(0.370)  |
|       | 12     | 4.5684 | 271.40 | 0.0539         | H-13→L(0.331)  |
|       | 1      | 2.4371 | 508.74 | 0.9886         | H→L(0.588)     |
|       | 2      | 2.9982 | 413.53 | 0.2955         | H-1→L(0.563)   |
|       | 3      | 3.4519 | 359.17 | 0.0940         | H→L+1(0.472)   |
|       | 4      | 3.5264 | 351.59 | 0.0001         | H-11→L(0.643)  |
|       | 5      | 3.7793 | 328.06 | 0.0233         | H-7→L(0.400)   |
|       | 6      | 3.9281 | 315.64 | 0.4145         | H-6→L(0.571)   |
|       | 7      | 4.0354 | 307.24 | 0.1702         | H-2→L(0.590)   |
| 8     | 4.1682 | 297.45 | 0.9267 | H→L+3(0.457)   |                |
| 9     | 4.1890 | 295.97 | 0.0960 | H-1→L+1(0.423) |                |
| 10    | 4.4757 | 277.02 | 0.1712 | H→L+8(0.411)   |                |
| 11    | 4.4921 | 276.00 | 0.1000 | H-3→L(0.312)   |                |
| 12    | 4.5093 | 274.95 | 0.0119 | H-14→L(0.353)  |                |

Table S3. The polarizability ( $\alpha$  in a.u.) of dye monomers.

| Dyes  | $\alpha_{xx}$ | $\alpha_{yy}$ | $\alpha_{zz}$ | $\alpha$ |
|-------|---------------|---------------|---------------|----------|
| LC1   | 1239.26       | 918.05        | 842.36        | 969.45   |
| LC4   | 1733.87       | 1002.14       | 1045.96       | 1169.64  |
| LC4N  | 1814.24       | 1132.69       | 1051.43       | 1184.94  |
| LC4NN | 1789.89       | 774.69        | 686.52        | 1194.33  |

Table S4. Estimated reorganization energies ( $\lambda$  in eV), electron recombination distance ( $r$  in Å), attenuation factor ( $\beta$  in Å<sup>-1</sup>), electron recombination rate ( $k_{rec}$  in s<sup>-1</sup>), and recombination resistance ( $R_0$  in Ω) for all dyes.

| Dye   | $\lambda$ | $r$   | $\beta$ | $k_{rec}$ | $R_0$ |
|-------|-----------|-------|---------|-----------|-------|
| LC1   | 0.80      | 13.41 | 0.7     | 2558      | 2152  |
| LC4   | 0.71      | 17.77 | 0.7     | 1042      | 2294  |
| LC4N  | 0.61      | 17.71 | 0.7     | 397       | 2123  |
| LC4NN | 0.60      | 17.62 | 0.7     | 327       | 2318  |
